# Supplementary material for: Cubic Ag/AgBr–graphene oxide nanocomposite: sono-synthesis and use as a solar photocatalyst for the degradation of DCF as a pharmaceutical pollutant
Source: Royal Society of Chemistry journal article supplement (doi:10.1039/c5ra16814g), 2015-01-01
Supplement: c5ra16814g1.pdf [file c5ra16814g1.pdf]

**Table 1.** Experimental design with Taguchi model.

| Run | Dose of catalyst<br>(g) | Time of sunlight<br>irradiation | pH |
|-----|-------------------------|---------------------------------|----|
| 1   | 0.04                    | 6                               | 5  |
| 2   | 0.04                    | 10                              | 6  |
| 3   | 0.04                    | 3                               | 9  |
| 4   | 0.015                   | 10                              | 5  |
| 5   | 0.015                   | 3                               | 6  |
| 6   | 0.015                   | 6                               | 9  |
| 7   | 0.030                   | 3                               | 5  |
| 8   | 0.030                   | 6                               | 6  |
| 9   | 0.030                   | 10                              | 9  |

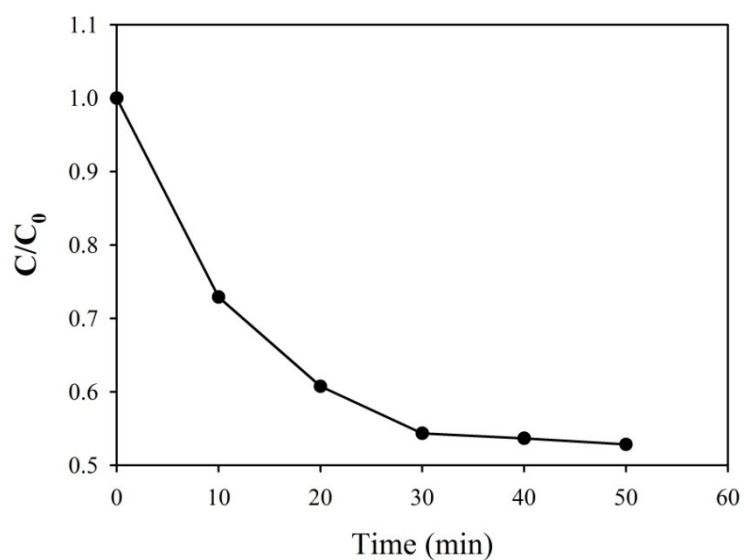

**S.1.** DCF adsorption at different times in dark with AG/AgBr/GO(U) .

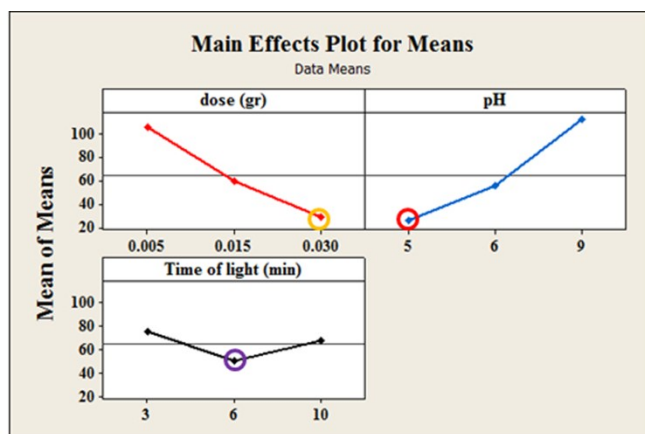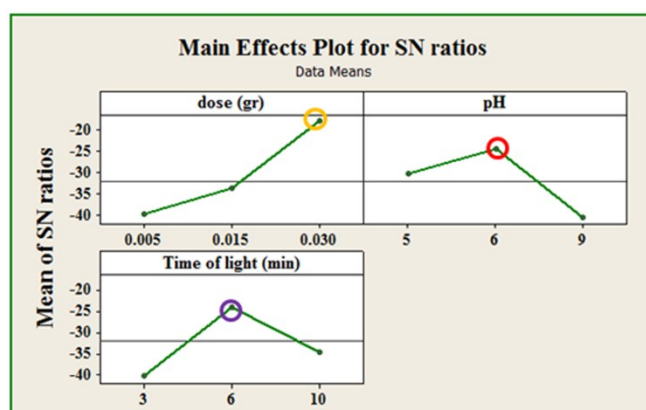

S.2. Optimum dose of catalyst, time of light and pH for DCF degradation by Ag/AgBr/GO (U).

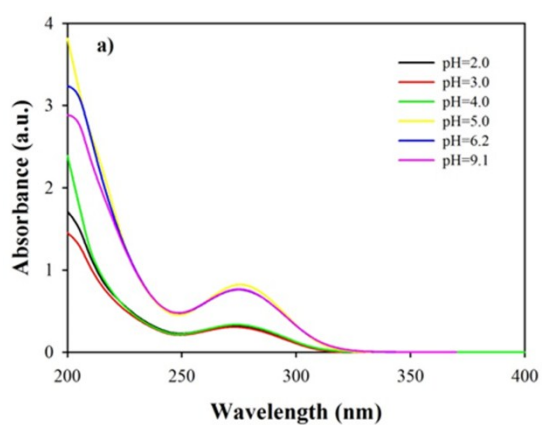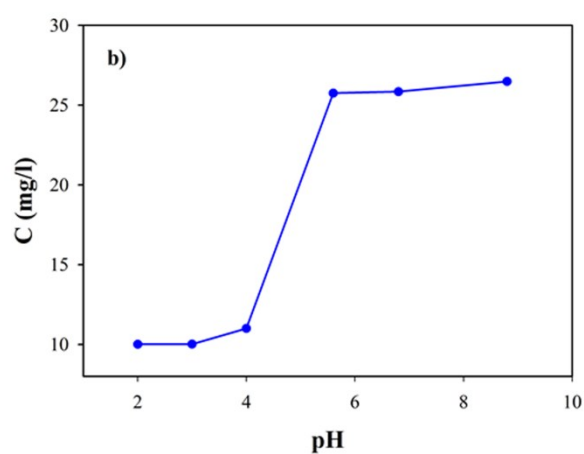

S.3. a) The variations of UV–visible spectrum of DCF (25ppm) in different pH. b) The variation of initial concentration of DCF (25ppm) in several pH.
